# Supplementary material for: Trade-offs Between Succulent and Non-succulent Epiphytes Underlie Variation in Drought Tolerance and Avoidance
Source: Research Square preprint supplement (doi:10.21203/rs.3.rs-899788/v1), 2021-09-30
Supplement: Supplementary file 1 [file 5fbc8d9c3d35786d13290778.pdf]

| <i>Functional Traits</i>                           | <b>Non-Succulent</b> | <b>Succulent</b> |
|----------------------------------------------------|----------------------|------------------|
| $g_{\min}$ (mmol m <sup>-2</sup> s <sup>-1</sup> ) | 3.831                | 6.581            |
| Tough (g mm <sup>-2</sup> )                        | 10.427               | 12.563           |
| LDMC (g g <sup>-1</sup> )                          | 0.266                | 0.154            |
| SLA (cm m <sup>-2</sup> )                          | 143.301              | 103.879          |
| WD (cm m <sup>-2</sup> )                           | 0.727                | 0.588            |
| SWC (g)                                            | 3.810                | 6.939            |
| $\pi\sigma$ (Mpa)                                  | -1.065               | -0.904           |
| TLP (Mpa)                                          | -1.230               | -1.029           |
| RWCTLP (%)                                         | 88.036               | 90.045           |
| $\epsilon$ (Mpa)                                   | 16.139               | 17.985           |
| CFT (Mpa <sup>-1</sup> )                           | 0.088                | 0.098            |
| CTLP (MPA <sup>-1</sup> )                          | 0.621                | 0.526            |
| C* (mol m <sup>-2</sup> MPA <sup>-1</sup> )        | 1.377                | 5.436            |
| SD (stomata cm <sup>-2</sup> )                     | 126.850              | 70.771           |
| LT (mm)                                            | 0.473                | 0.930            |
| CUT (mm)                                           | 0.009                | 0.013            |
| LWC (%)                                            | 0.734                | 0.830            |
| LWS (mm)                                           | 0.339                | 0.896            |
| $\delta^{15}\text{N}$ (‰)                          | -3.888               | -3.032           |
| $\delta^{13}\text{C}$ (‰)                          | -31.089              | -30.635          |
| C:N (%)                                            | 53.457               | 54.310           |
